# Supplementary material for: Gold nanorod-assembled ZnGa2O4:Cr nanofibers for LED-amplified gene silencing in cancer cells
Source: Royal Society of Chemistry journal article supplement (doi:10.1039/c8nr03802c), 2018-01-01
Supplement: c8nr03802c1.pdf [file c8nr03802c1.pdf]

## Supporting Information

### **Gold nanorods assembled ZnGa<sub>2</sub>O<sub>4</sub>:Cr nanofibers for LED-amplified gene silencing in cancer cells**

*Lun Qin,<sup>a</sup> Peijian Yan,<sup>b</sup> Congkun Xie,<sup>a</sup> Jie Huang,<sup>c</sup> Zhaohui Ren,<sup>a</sup> Xiang Li,<sup>\* a</sup>*

*Serena Best,<sup>d</sup> Xiujun Cai,<sup>b</sup> Gaorong Han<sup>\* a</sup>*

<sup>a</sup> State Key Laboratory of Silicon Materials, School of Materials Science and Engineering, Zhejiang University, Hangzhou 310027, P. R. China

<sup>b</sup> Key Laboratory of Endoscopic Technique Research of Zhejiang Province, Sir Run Run Shaw Hospital, Zhejiang University, Hangzhou 310027, P. R. China

<sup>c</sup> Department of Mechanical Engineering, University College London, Torrington Place, London WC1E 7JE

<sup>d</sup> Department of Materials Science and Metallurgy, University of Cambridge, Cambridge CB3 0FS, UK

\* E-mail: xiang.li@zju.edu.cn;



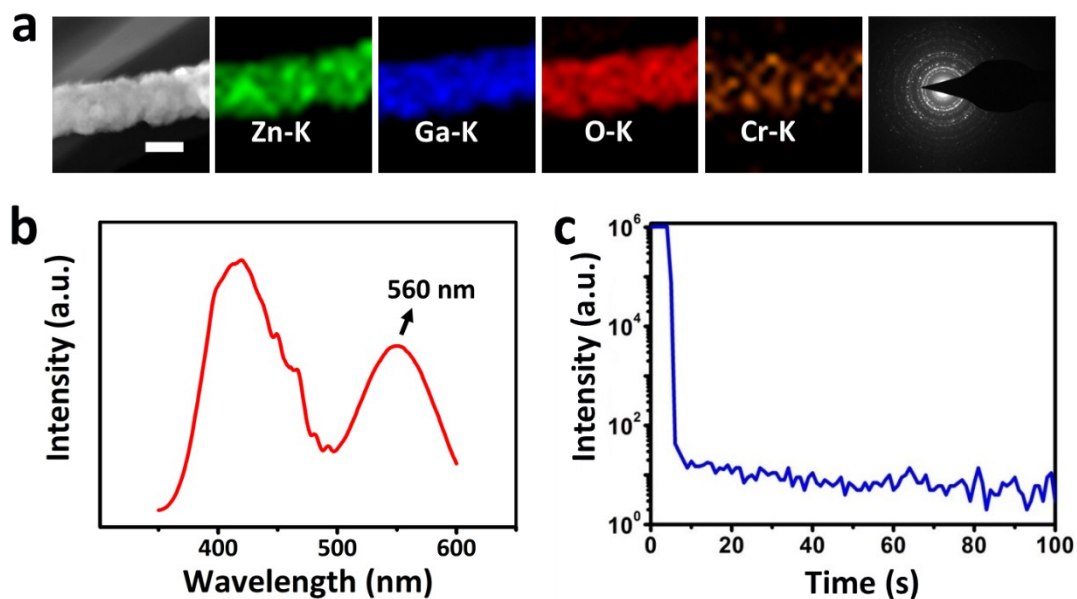

**Figure S2.** (a) EDS element mapping (scale bar is 100 nm); (b) Xenon lamp excitation spectrum of ZGOC nanofibers; (c) Long persistent duration of ZGOC nanofibers excited by a 560 nm Xenon lamp for 100s.

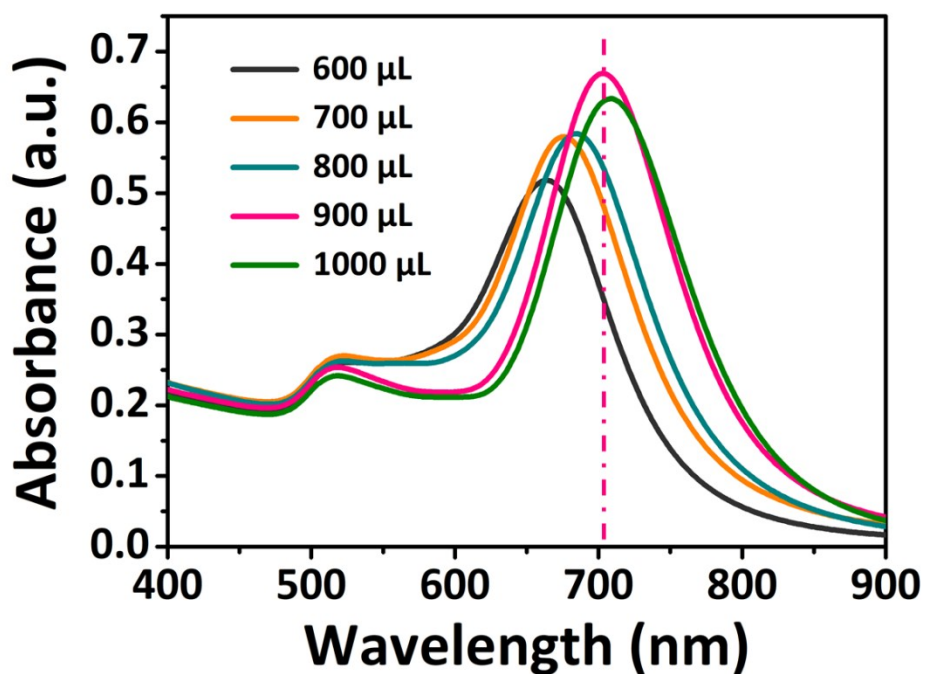

**Fig. S3** UV-vis spectra of gold nanorods prepared with different content of  $\text{AgNO}_3$  solutions (10 mM).

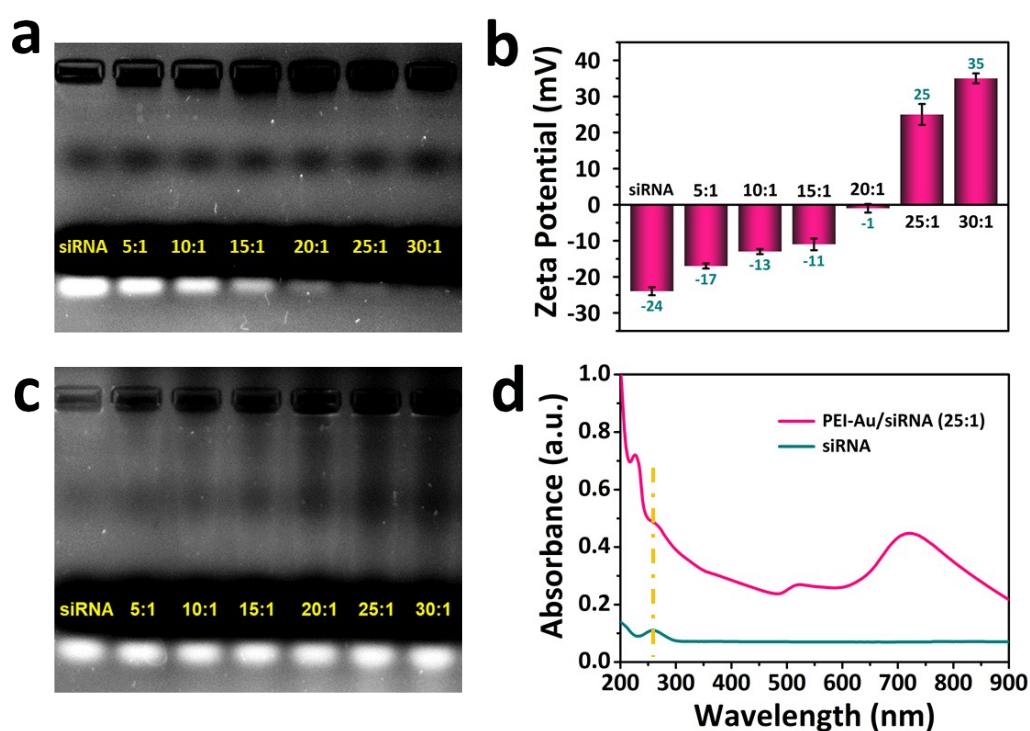

**Fig. S4** Optimization and siRNA release from the PEI-Au/siRNA. (a) Agarose gel retardation assay of PEI-Au/siRNA complexes under varied weight ratios (5:1, 10:1, 15:1, 20:1, 25:1, and 30:1). (b) The relationship between Zeta potential and weight ratios. (mean of five measurements) (c) protection of siRNA against RNaseA digestion and siRNA release by competitive binding sodium dodecyl sulfate (SDS) with carriers after degradation. Naked siRNA was used as a control. (d) UV-vis spectra of PEI-Au/siRNA particles prepared at a weight ratio of 25:1 and naked siRNA.

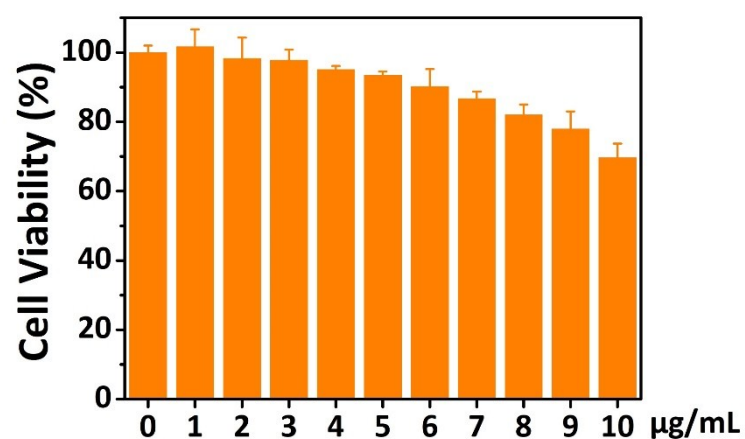

Fig. S5 MTT assay of cell viability incubation with PEI.

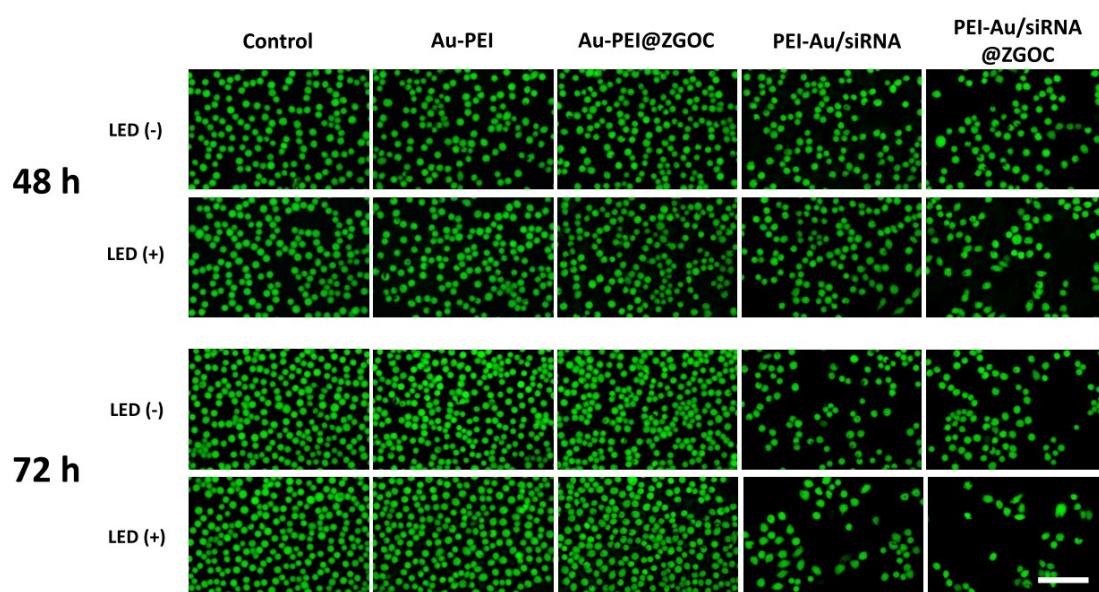

**Fig. S6** Fluorescent images of HepG2 cells incubated with Au-PEI, PEI-Au@ZGOC, PEI-Au/siRNA and PEI-Au/siRNA@ZGOC in response to LED for 48 h and 72 h. The cells were stained with green fluorescence by calcein-AM. The scale bar is 100  $\mu\text{m}$ .
